# Supplementary material for: Original Approach to Synthesize TiO2/ZnO Hybrid Nanosponges Used as Photoanodes for Photoelectrochemical Applications
Source: MDPI journal article supplement (doi:10.3390/ma14216441), 2021-10-27
Supplement: s1 [file s1]

# Supplementary Materials: Original Approach to Synthesize TiO<sub>2</sub>/ZnO Hybrid Nanosponges Used as Photoanodes for Photoelectrochemical Applications

P. J. Navarro-Gázquez <sup>1</sup>, M. J. Muñoz-Portero <sup>1</sup>, E. Blasco-Tamarit <sup>1</sup>, R. Sánchez-Tovar <sup>2</sup>, R. M. Fernández-Domene <sup>2</sup> and J. García-Antón <sup>1,\*</sup>

<sup>1</sup> Instituto Universitario de Seguridad Industrial, Radiofísica y Medioambiental (ISIRYM). Universitat Politècnica de València. Camino de Vera s/n, 46022 Valencia, Spain; pednagz@etsii.upv.es (P.J.N.-G.); mjmunoz@iqn.upv.es (M.J.M.-P.); meblasco@iqn.upv.es (E.B.-T.); jgarciaa@iqn.upv.es (J.G.-A.)

<sup>2</sup> Departamento de Ingeniería Química, Universitat de Valencia, Av. de las Universitats, s/n, 46100 Burjassot, Spain; rita.sanchez@uv.es (R.S.-T.); ramon.fernandez@uv.es (R.M.F.-D.)

\* Correspondence: jgarciaa@iqn.upv.es ; Tel.: +34-96-387-76-32; Fax: 34-96-387-76-39

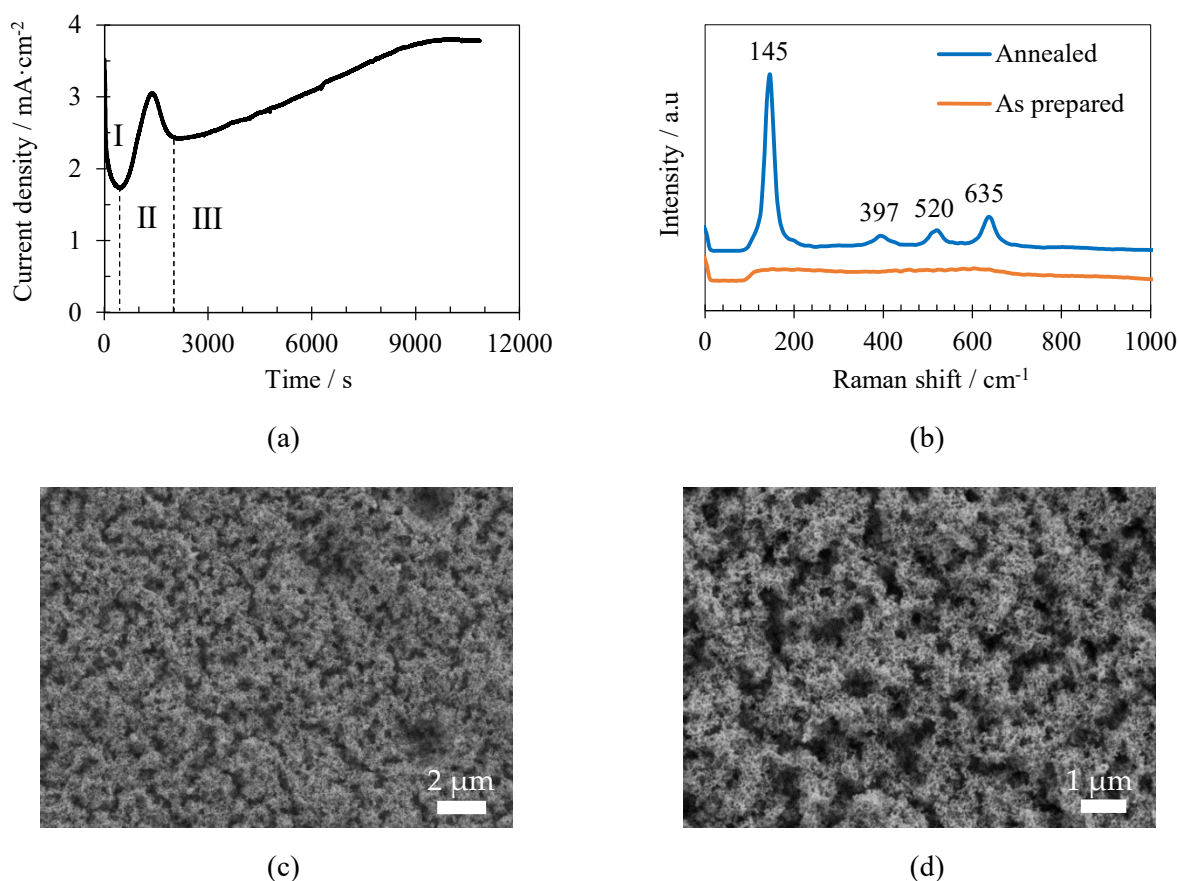

**Figure S1.** (a) Current density versus time during anodization of Ti in 0.27 M NH<sub>4</sub>F containing glycerol/water (60:40 vol. %) at 30 V for 3 h. (b) Raman spectra of TiO<sub>2</sub> nanosponges before and after the heat treatment at 450 °C for 1 h. FE-SEM images of the annealed TiO<sub>2</sub> nanosponges at (c) 5000 X, and (d) 15000 X.

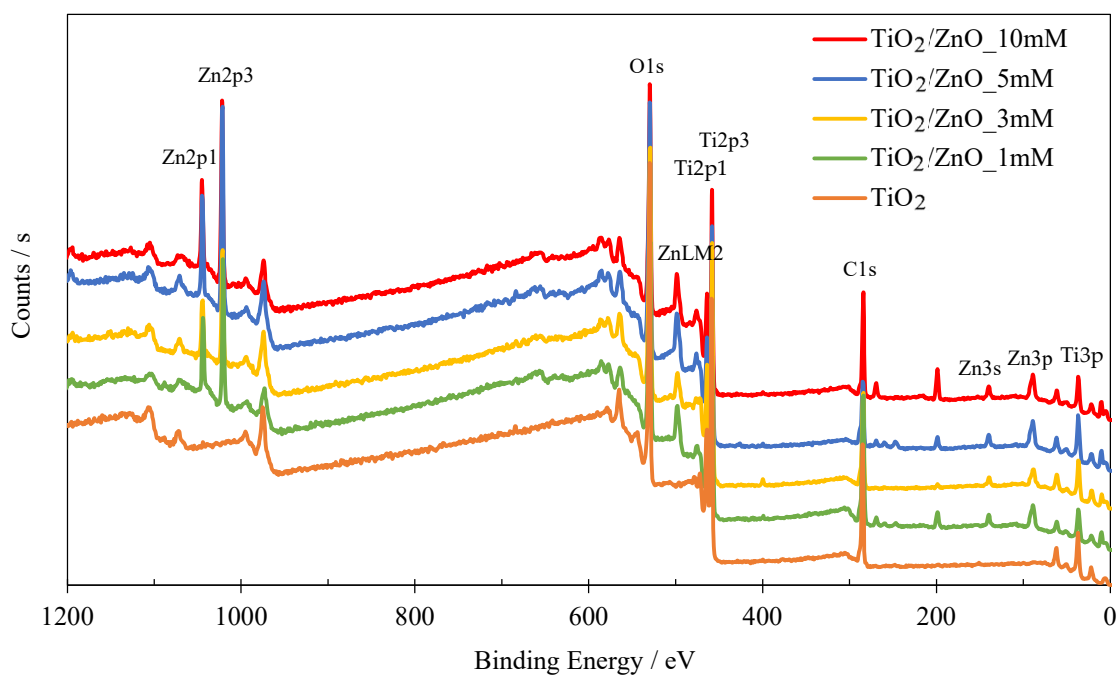

**Figure S2.** XPS spectra of TiO<sub>2</sub> nanosponges and TiO<sub>2</sub>/ZnO hybrid nanosponges electrodeposited on crystalline TiO<sub>2</sub> for 15 minutes at 75 °C with different Zn(NO<sub>3</sub>)<sub>2</sub> concentrations.

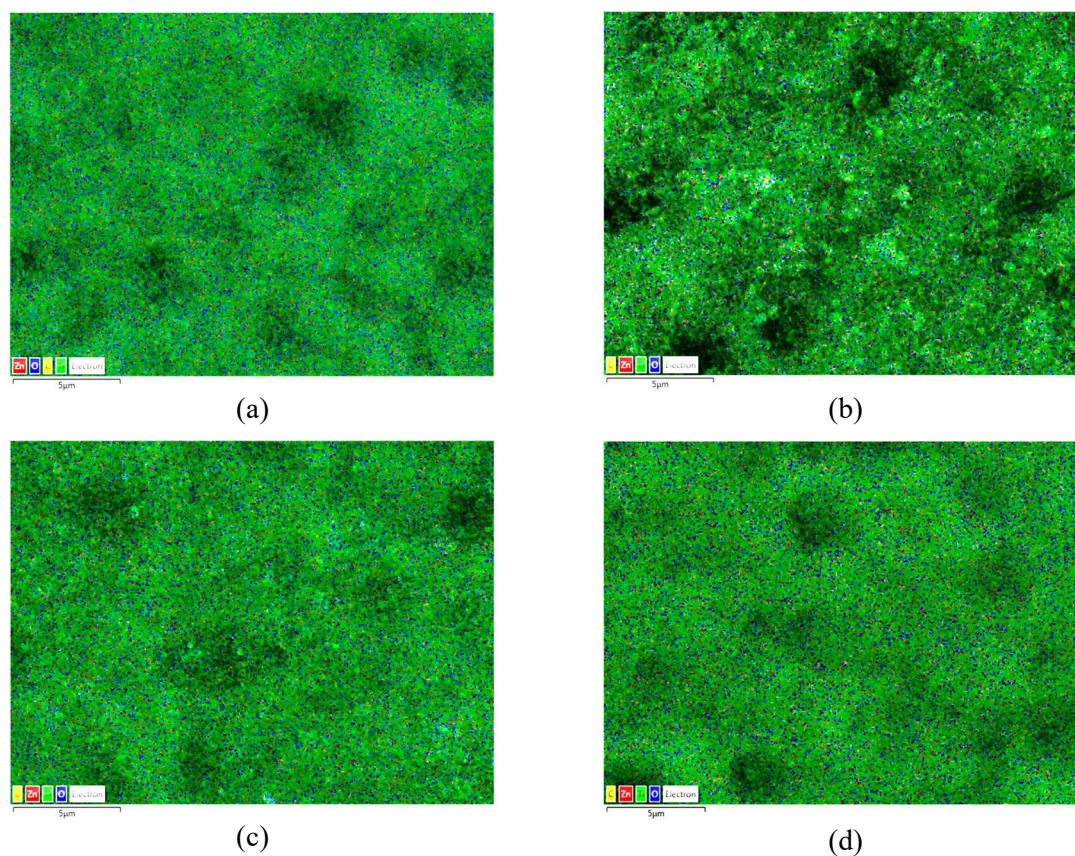

**Figure S3.** EDX mapping of TiO<sub>2</sub>/ZnO hybrid nanosponges electrodeposited for 15 min at 75 °C with Zn(NO<sub>3</sub>)<sub>2</sub> concentration of (a) 1, (b) 3, (c) 5, and (d) 10 mM.

**Table S1.** Current density at 0.6 V<sub>Ag/AgCl</sub> under illuminated conditions ( $i_{\max}$ ), increase in current density at 0.6 V<sub>Ag/AgCl</sub> between dark and light conditions ( $\Delta i$ ), and percentage improvement in current density at 0.6 V<sub>Ag/AgCl</sub> under illumination (%<sub>improvement</sub>) with respect to the TiO<sub>2</sub> nanosponges, for TiO<sub>2</sub>/ZnO hybrid nanosponges electrodeposited on amorphous TiO<sub>2</sub> at 25 °C with 1 mM Zn(NO<sub>3</sub>)<sub>2</sub>.

| Time (min) | $i_{\max}$ (mA·cm <sup>-2</sup> ) | $\Delta i$ (mA·cm <sup>-2</sup> ) | % <sub>improvement</sub> |
|------------|-----------------------------------|-----------------------------------|--------------------------|
| 15         | 0.029                             | 0.028                             | -48.21                   |
| 30         | 0.024                             | 0.023                             | -57.14                   |
| 60         | 0.014                             | 0.012                             | -75.00                   |

**Table S2.** Analysis of variance for density current (mA·cm<sup>-2</sup>) of the individual factors of Zn(NO<sub>3</sub>)<sub>2</sub> concentrations and temperature, the interaction between them, and their quadratic effects.

|                                                | Sum of squares | Gl | Mean square  | F <sub>ratio</sub> | p-Value |
|------------------------------------------------|----------------|----|--------------|--------------------|---------|
| Zn(NO <sub>3</sub> ) <sub>2</sub>              | 0.00016737     | 1  | 0.00016737   | 9.28               | 0.0057  |
| Temperature                                    | 0.00197606     | 1  | 0.00197606   | 109.55             | 0.0000  |
| Zn(NO <sub>3</sub> ) <sub>2</sub> <sup>2</sup> | 5.88984E-7     | 1  | 5.88984E-7   | 0.03               | 0.8582  |
| Zn(NO <sub>3</sub> ) <sub>2</sub> ·T           | 2.58574E-7     | 1  | 2.58574E-7   | 0.01               | 0.9057  |
| Temperature <sup>2</sup>                       | 0.0000449854   | 1  | 0.0000449854 | 2.49               | 0.1279  |
| Residual error                                 | 0.000414857    | 23 | 0.0000180372 |                    |         |
| Total                                          | 0.00264598     | 29 |              |                    |         |

Statistically significant factor when p-Value is lower to 0.05.
